# Supplementary material
Source: PubMed Central journal article supplement (PMC4814021)
Supplement: DS_10.1177_0022034514565647.pdf [file DS_10.1177_0022034514565647.pdf]

# Osterix Regulates Tooth Root Formation in a Site-specific Manner

T.H. Kim<sup>1\*</sup>, C.H. Bae<sup>1\*</sup>, J.C. Lee<sup>1</sup>, J.E. Kim<sup>2</sup>, X. Yang<sup>3</sup>, B. de Crombrughe<sup>4</sup>, and E.S. Cho<sup>1</sup>

## Appendix

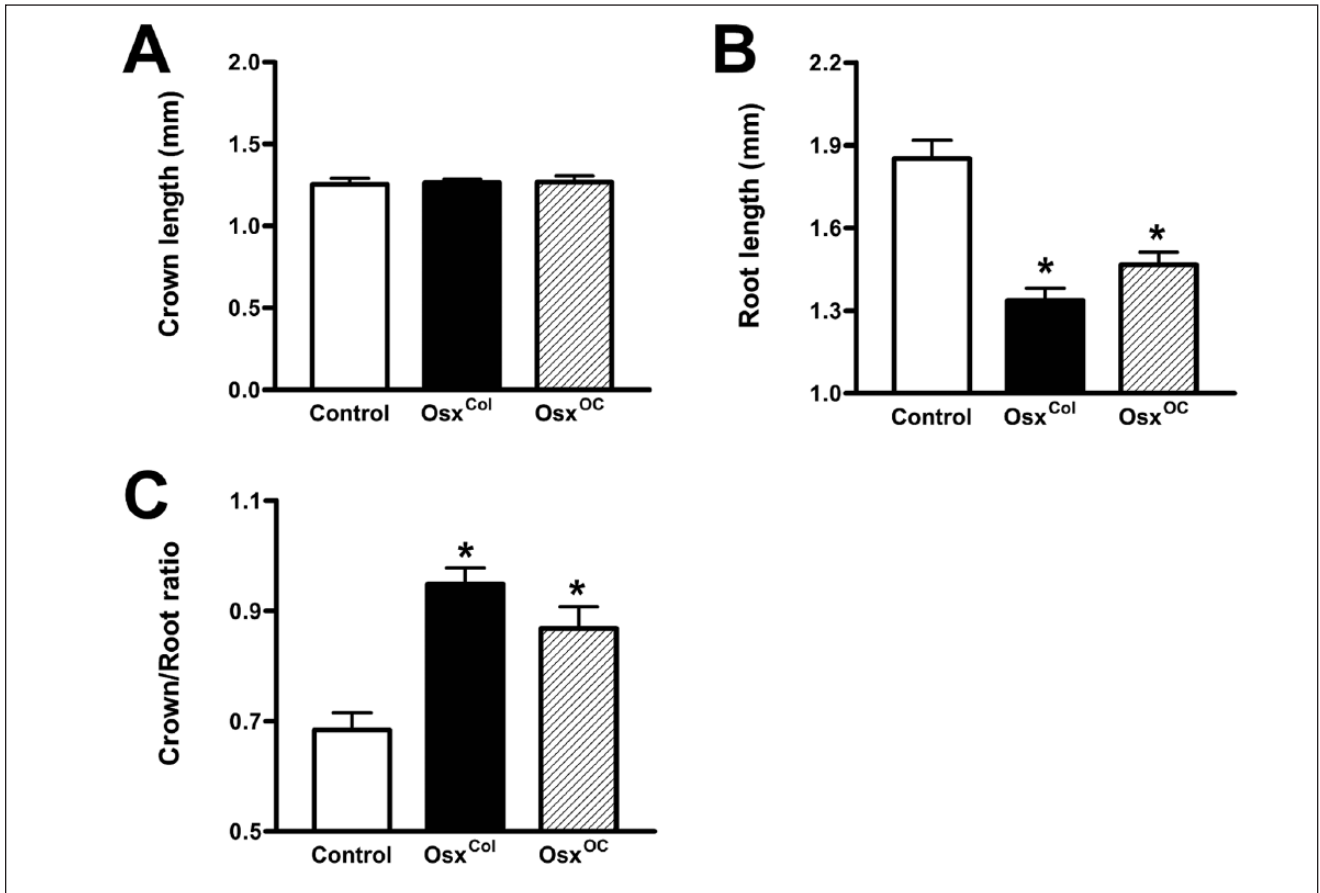

**Appendix Figure 1.** Measurement of crown and root length in the mandibular first molars of *Osx<sup>Col</sup>* and *Osx<sup>OC</sup>* mice at 4 wk. (A) Crown length. (B) Root length. (C) Crown/root ratio. \* $P < 0.05$ .

<sup>1</sup>Cluster for Craniofacial Development and Regeneration Research, Institute of Oral Biosciences, Chonbuk National University School of Dentistry, Jeonju, South Korea

<sup>2</sup>Department of Molecular Medicine, School of Medicine, Kyungpook National University, Daegu, South Korea

<sup>3</sup>Genetic Laboratory of Development and Disease, Institute of Biotechnology, Beijing, China

<sup>4</sup>Department of Molecular Genetics, The University of Texas M.D. Anderson Cancer Center, Houston, TX, USA

\*Authors contributing equally to this work.

### Corresponding Author:

E.S. Cho, Laboratory for Craniofacial Biology, Chonbuk National University School of Dentistry, 567 Baekje-daero, Deokjin-gu, Jeonju 561-756, South Korea.

Email: oasis@jbnu.ac.kr

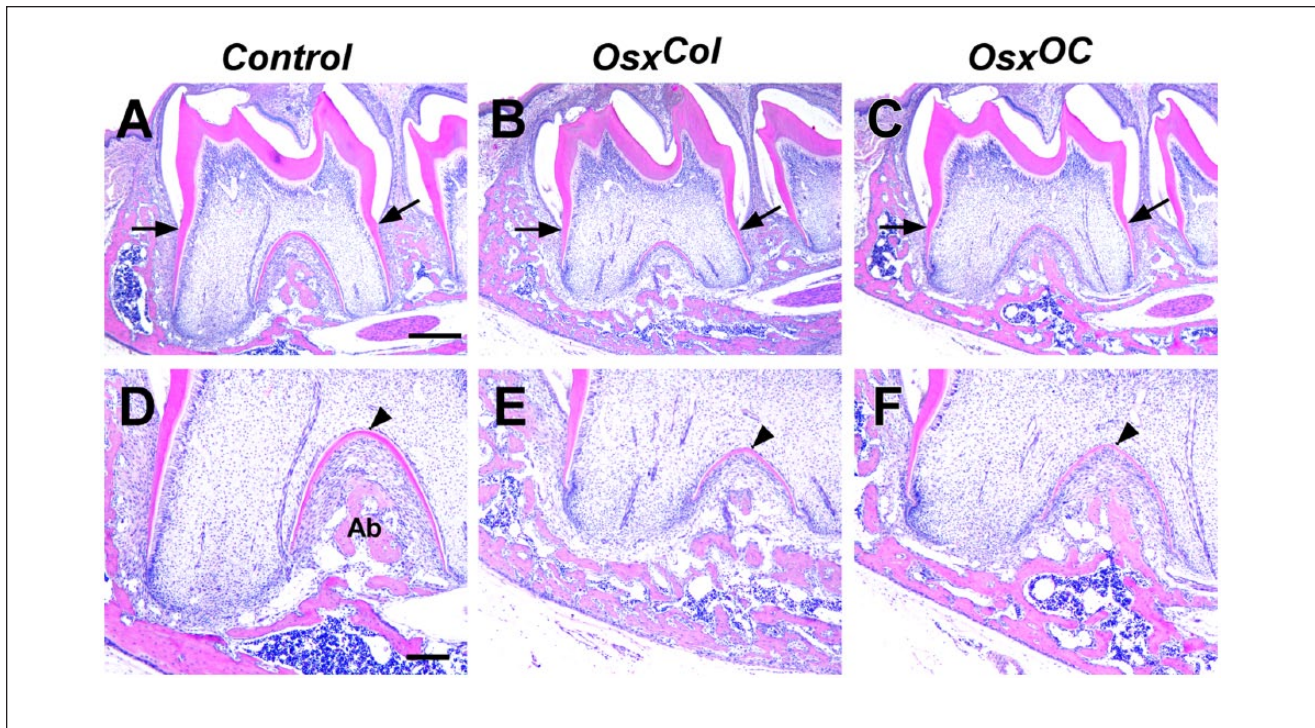

**Appendix Figure 2.** Histologic features of the mandibular first molars in *Osx<sup>Col</sup>* and *Osx<sup>OC</sup>* mice at P14. The black arrows indicate cemento-enamel junction and black arrowheads indicate interradicular dentin. Ab, alveolar bone. Scale bars: 300  $\mu\text{m}$  (A–C), 200  $\mu\text{m}$  (D–F).
